# Supplementary material
Source: HighWire-hosted journal article supplement (doi:10.1101/rna.078814.121)
Supplement: Supplemental_Material_final.docx [file Supplemental_Material_final.docx]

**Table S1:** Sequence composition and secondary structures of RS10 based switches and the designed RP-RS constructs A and C, and those with the exchanged hybrid tRNA. Sequence of the theophylline aptamer TCT8-4 is indicated in red and the tRNA sequences in green. The dot-bracket notation indicates the predicted minimum free energy secondary structures of ligand-unbound RNAs (Ender et al. 2021).

Riboswitches with *E. coli* tRNA supF

>RP-RS A

AAGUGAUACCAGCAUCGUCUUGAUGCCCUUGGCAGCACUUCAGAAAUCUUUGGGGUGUUGUUAGGUGGGGUUCCCGAGCGGCCAAAGGGAGCAGACUCUAAAUCUGCCGUCAUCGACUUCGAAGGUUCGAAUCCUUCCCCCACCACCA

...........(((((.....)))))...(((((((((((((((....)))))))))))))))(((((((....((((((((.....((((....))))......)))))..))).....(((((.......))))))))))))....

>RP-RS C

AAGUGAUACCAGCAUCGUCUUGAUGCCCUUGGCAGCACUUCAGAAAUCUUUGGAGUGCUGGUGGGGUUCCCGAGCGGCCAAAGGGAGCAGACUCUAAAUCUGCCGUCAUCGACUUCGAAGGUUCGAAUCCUUCCCCCACCACCA

..(((...((((((((.....)))))...)))((((((((((((....))))))))))))((((((....((((((((.....((((....))))......)))))..))).....(((((.......))))))))))))))..

Riboswitches with tRNA supF-h (hybrid from *E. coli* tRNA supF and tRNATyr from *T. thermophilus*)

>RP-RS A-h

AAGUGAUACCAGCAUCGUCUUGAUGCCCUUGGCAGCACUUCAGAAAUCUUUGGGGUGUUGUUAGGUGGGGUUCCCGAGCGGCCAAAGGGGACGGUCUCUAAAACCGUUGGCGUAUGCCUUCGAAGGUUCGAAUCCUUCCCCCACCACCA

...........(((((.....)))))...(((((((((((((((....)))))))))))))))(((((((..(((...........)))((((((.......))))))(((....)))...(((((.......))))))))))))....

>RP-RS C-h

AAGUGAUACCAGCAUCGUCUUGAUGCCCUUGGCAGCACUUCAGAAAUCUUUGGAGUGCUGGUGGGGUUCCCGAGCGGCCAAAGGGGACGGUCUCUAAAACCGUUGGCGUAUGCCUUCGAAGGUUCGAAUCCUUCCCCCACCACCA

..(((...((((((((.....)))))...)))((((((((((((....))))))))))))((((((..(((...........)))((((((.......))))))(((....)))...(((((.......))))))))))))))..

Riboswitches with tRNAPyl from *M. mazei*

>RP-RS A-P

AAGUGAUACCAGCAUCGUCUUGAUGCCCUUGGCAGCACUUCAGAAAUCUUUGGGGUGUUGUUAGGAAACCUGAUCAUGUAGAUCGAAUGGACUCUAAAUCCGUUCAGCCGGGUUAGAUUCCCGGGGUUUCCGCCA

...........(((((.....)))))...(((((((((((((((....)))))))))))))))(((((((.((((.....))))(((((((.......)))))))..(((((.......))))))))))))....

>RP-RS C-P

AAGUGAUACCAGCAUCGUCUUGAUGCCCUUGGCAGCACUUCAGAAAUCUUUGGAGUGCUGGAAACCUGAUCAUGUAGAUCGAAUGGACUCUAAAUCCGUUCAGCCGGGUUAGAUUCCCGGGGUUUCCGCCA

...........(((((.....)))))...(((((((((((((((....)))))))))))(((((((.((((.....))))(((((((.......)))))))..(((((.......))))))))))))))))

**Table S2:** Quantitation of mature tRNA supF-h in *E. coli* BW cells from three independent experiments and clones. The signal of mature tRNA supF-h was quantified relative to the 5S rRNA signal. More details of the experiment are described in Figure 2. Theo: Theophylline

|  | **Experiment 1** | | **Experiment 2** | | **Experiment 3** | |
| --- | --- | --- | --- | --- | --- | --- |
|  | Theo [0 mM] | Theo [2 mM] | Theo [0 mM] | Theo [2 mM] | Theo [0 mM] | Theo [2 mM] |
|  | relative signal supF-h/5S rRNA | | | | | |
| **nat-supF** |  |  |  |  |  |  |
| PRORP1 | 7.830 | 10.280 | 11.330 | 12.700 | 2.670 | 2.370 |
| PRORP2 | 20.670 | 22.680 | 16.440 | 14.060 | 4.910 | 4.650 |
| *E. coli* RNase P | 26.830 | 23.750 | 46.890 | 34.720 | 11.750 | 11.160 |
|  |  |  |  |  |  |  |
| **RP-RS A** |  |  |  |  |  |  |
| PRORP1 | 12.310 | 14.670 | 16.900 | 21.880 | 0.180 | 0.180 |
| PRORP2 | 1.120 | 1.240 | 27.770 | 12.050 | 0.320 | 0.320 |
| *E. coli* RNase P | 54.480 | 54.900 | 31.210 | 37.660 | 15.050 | 14.640 |
|  |  |  |  |  |  |  |
| **RP-RS C** |  |  |  |  |  |  |
| PRORP1 | 5.140 | 13.270 | 2.360 | 7.970 | 1.250 | 3.950 |
| PRORP2 | 11.130 | 29.950 | 4.200 | 12.840 | 2.260 | 7.960 |
| *E. coli* RNase P | 24.930 | 47.300 | 18.780 | 28.350 | 10.630 | 18.780 |

References

Ender A, Etzel M, Hammer S, Findeiß S, Stadler P, Mörl M. 2021. Ligand-Dependent tRNA Processing by a Rationally Designed RNase P Riboswitch // Ligand-dependent tRNA processing by a rationally designed RNase P riboswitch, *Nucl Acids Res* **49:** 1784–1800 doi: 10.1093/nar/gkaa1282.
